1 **Clinical Performance Evaluation of a SARS-CoV-2 Rapid Antibody Test for Determining Past**  
2 **Exposure to SARS-CoV-2**

3 Peter Findeisen<sup>a</sup>, Hugo Stiegler<sup>b</sup>, Eloisa Lopez-Calle<sup>c</sup>, Tanja Schneider<sup>d</sup>, Eva Urlaub<sup>c</sup>, Johannes  
4 Hayer<sup>c</sup>, Claudia Zemmrich<sup>e,f#</sup>

5

6 <sup>a</sup>MVZ Labor Dr. Limbach & Kollegen GbR, Heidelberg, Germany

7 <sup>b</sup>MVZLM - Medizinisches Versorgungszentrum für Labormedizin und Mikrobiologie Ruhr GmbH,  
8 45138 Essen, Germany

9 <sup>c</sup>Roche Diagnostics GmbH, Mannheim, Germany

10 <sup>d</sup>Roche Diagnostics GmbH, Penzberg, Germany

11 <sup>e#</sup>Institute for Pharmacology and Preventive Medicine, Menzelstrasse 21, 15831 Mahlow,  
12 Germany

13 <sup>f</sup>Roche Diagnostics International Ltd. Rotkreuz, Switzerland

14

15 Corresponding author: Claudia Zemmrich, Institute for Pharmacology and Preventive Medicine,  
16 Menzelstrasse 21, 15831 Mahlow, Germany, [claudia.zemmrich@ippmed.de](mailto:claudia.zemmrich@ippmed.de)

17 Running title: Performance of a SARS-CoV-2 rapid antibody test

18

**NOTE: This preprint reports new research that has not been certified by peer review and should not be used to guide clinical practice.**

19 **Abstract**

20 The true prevalence and population seropositivity of SARS-CoV-2 infection remains unknown,  
21 due to the number of asymptomatic infections and limited access to high-performance  
22 antibody tests. To control the COVID-19 pandemic it is crucial to understand the true  
23 seroprevalence, but not every region has access to extensive centralized PCR and serology  
24 testing. Currently available rapid antibody tests lack the accuracy needed for recommendation  
25 by health authorities. To fill this gap, we analyzed and validated the clinical performance of a  
26 new point-of-care SARS-CoV-2 Rapid Antibody Assay, a chromatographic immunoassay for  
27 qualitative detection of IgM/IgG antibodies for use in near-patient settings. Analysis was  
28 performed using 42 Anti-SARS-Cov-2 positive (CoV+) and 92 Anti-SARS-Covid-2 negative (CoV-)  
29 leftover samples from before December 2019, using the Elecsys® Anti-SARS-CoV-2 as the  
30 reference assay. Analytical specificity was tested using leftover samples from individuals with  
31 symptoms of common cold collected before December 2019. The SARS-CoV-2 Rapid Antibody  
32 Test was 100.0% (95% CI 91.59–100.00) sensitive and 96.74% (95% CI 90.77–99.32) specific with  
33 an assay failure rate of 0.00%. No cross-reactivity was observed against the common cold panel.  
34 Method comparison was additionally conducted by two external laboratories, using 100  
35 CoV+/275 CoV- samples, also comparing whole blood versus plasma matrix. The comparison  
36 demonstrated for plasma 96.00% positive/96.36% negative percent agreement with the Elecsys  
37 Anti-SARS-CoV-2 and overall 99.20% percent agreement between whole blood and EDTA  
38 plasma. The SARS-CoV-2 Rapid Antibody Test demonstrated similar clinical performance to the  
39 manufacturer’s data and to a centralized automated immunoassay, with no cross-reactivity to  
40 common cold panels.

41 Key words: SARS-CoV-2, rapid antibody test, past exposure

## 42 **Introduction**

43 The global COVID-19 pandemic created an urgent unmet clinical need to investigate reliable  
44 diagnostic tools for patients, as well as understand the extent of exposure and spread of  
45 infection among wider populations (1-3). Acute diagnosis of the COVID-19 infection is based on  
46 identification of viral RNA via PCR from swab samples, which is detectable from symptom onset  
47 for approximately four weeks (2, 4). As is known from localized testing during outbreaks, many  
48 people who are infected with the virus do not present with any clinical symptoms – current  
49 estimates suggest around 30% of seropositive individuals are asymptomatic (5-7). Those  
50 individuals carry the virus and potentially spread it to others, who may react with a severe  
51 COVID-19 disease (8). No region in the world can perform PCR testing of every patient with  
52 common cold symptoms or who has had contact with a suspected COVID-19 patient. In addition  
53 to clinical testing of individuals with suspected COVID-19 for direct virus detection, surveillance  
54 strategies need to combine several diagnostic techniques to monitor disease kinetics in wider  
55 populations (2, 9). To control the pandemic, it seems crucial to investigate who has already had  
56 an infection and has developed antibodies as an immune response, and vice versa, who is still  
57 vulnerable to an infection (10-14).

58 Antibody tests are not intended to diagnose an acute COVID-19 infection, more specific  
59 diagnostic methods should be performed to obtain this (2). Ongoing research on the level and  
60 duration of immunity of seropositive persons will add further value to the clinical and  
61 epidemiological interpretation of positive antibody testing results. Preliminary data suggest  
62 that high affinity antibody tests show good correlation with neutralizing activity (15).

63 Based on current evidence, immunoglobulin M (IgM) antibodies are detectable within 5 days  
64 after symptom onset and immunoglobulin G (IgG) antibodies within 5–7 days (4, 16-23).  
65 Depending on the applied method, seroconversion is observed after a median of 10–13 days  
66 after symptom onset for IgM and 12–14 days for IgG, and maximum for both is reached after 2  
67 weeks (4, 16, 19-26). Individual levels and kinetics of both IgM and IgG are highly variable,  
68 which is why simultaneous detection of both is recommended.

69 Currently available rapid antibody tests require improved accuracy before being recommended  
70 by competent authorities and used by healthcare professionals (HCPs) in the wider population  
71 (2, 3). The US Food and Drug Administration (FDA) released technical requirements for antibody  
72 tests on April 4, 2020, that include a specificity of  $\geq 95\%$  and cross-reactivity testing for  
73 common cold and other coronaviruses (27). There are different high-throughput Anti-SARS-  
74 CoV-2 antibody tests available; the assay selected as the reference for our test (Elecsys Anti-  
75 SARS-CoV-2 Immunoassay) is based on electrochemiluminescence (ECLIA), using a double-  
76 antigen sandwich test principle and a recombinant protein representing the antigen for the  
77 determination of antibodies to SARS-CoV-2, namely the nucleocapsid protein (N) (28). It  
78 provides a qualitative result with a sensitivity of 100.0% (95% CI 88.10–100.0) at  $\geq 14$  days after  
79 PCR confirmation and a specificity of 99.81% (95% CI 99.65–99.91) (28).

80  
81 Rapid tests, also called point-of-care (PoC) tests, combine immunoassay and chromatography  
82 for a qualitative detection of antibodies. The selected test (*Anti-SARS-CoV-2 Rapid Antibody*  
83 *Test [SD Biosensor, Chungcheongbuk-do, Republic of Korea]*) is a CE marked lateral flow assay  
84 displaying a visual ‘yes/no’ answer for the selective detection of specific IgG and/or IgM  
85 antibodies to SARS-CoV-2, with two separate colored bands for IgG and IgM (29). The  
86 manufacturer states the specificity is 98.65% and sensitivity beyond 14 days after symptom

87 onset of 99.03%, tested on 103 PCR-confirmed CoV+ and 222 CoV- samples (29). The samples  
88 had also been tested for early sensitivity between 7 and 14 days after symptom onset with a  
89 result of 92.59%. SD Biosensor has performed several cross-reactivity studies involving  
90 numerous specimens, including influenza A and B.

91

92 In this study series, we further validated and extended the manufacturers' clinical performance  
93 and cross-reactivity data and externally performed a matrix and method comparison to gain  
94 additional data on the overall assay performance.

## 95 **Materials and Methods**

### 96 ***The assay***

97 The assay (**Figure 1**) needs 10 µl human serum or plasma, or 20 µl whole venous or capillary  
98 blood sample to be filled into the preformed well of the test device. Three pre-coated lines  
99 mark the "C" control line, and the "G" and "M" test lines for IgG and IgM. Monoclonal chicken  
100 IgY antibody is coated on the "C" region, and monoclonal anti-human IgG antibody and  
101 monoclonal anti-human IgM antibody are coated on the "G" and "M" test line region. During  
102 the test, SARS-CoV-2-specific antibodies in the sample interact with recombinant SARS-CoV-2  
103 protein (nucleocapsid and spike protein) conjugated with colloidal gold particles forming  
104 antibody-antigen gold particle complexes. This complex migrates on the membrane via  
105 capillary action until the "M" and "G" test line, where it will be captured by the monoclonal  
106 anti-human IgG antibody or monoclonal anti-human IgM antibody. A violet test line would be  
107 visible in the result window if SARS-CoV-2-specific antibodies are present in the sample. The  
108 intensity of the colored test line varies depending upon the amount of SARS-CoV-2 antibodies

109 present in the sample. Even if the color is faint, the test result should be interpreted as a  
110 positive result. The control line is used as procedural control and should always appear if the  
111 test procedure is performed properly and the test reagents are working.

## 112 ***Study design***

113 A performance analysis was conducted at Roche Diagnostics (Penzberg, Mannheim, Germany)  
114 using 42 Elecsys Anti-SARS-CoV-2 confirmed CoV+ and 92 leftover samples from healthy donors,  
115 collected before December 2019 and additionally confirmed by the Elecsys Anti-SARS-CoV-2  
116 CoV- (56 lithium heparin plasma, 36 EDTA plasma). Cross-reactivity testing was conducted with  
117 18 samples from individuals expressing signs and symptoms of common cold (i.e. sore throat,  
118 cough, fever) collected before December 2019. Additional matrix equivalence and read-out  
119 time analysis captured 159 Elecsys referenced CoV- samples, consisting of 55 heparin plasma,  
120 55 EDTA plasma and 49 serum samples.

121 Additionally, an independent comparison was performed with matched EDTA plasma and  
122 whole blood samples from a total of 375 anonymized leftover samples at two external testing  
123 sites. In total, 100 samples tested positive for SARS-CoV-2 antibodies by the Elecsys anti-SARS-  
124 CoV2 immunoassay and 275 negative samples (25 CoV+/75 negative- subjects at MVZLM Ruhr  
125 GmbH, Essen and 75 CoV+/200 negative subjects at MVZ Labor Dr. Limbach & Kollegen GbR  
126 Heidelberg). No information on PCR result or time of sample collection related to symptom  
127 onset was available. All samples were analyzed with the Anti-SARS-CoV-2 Rapid Antibody Assay  
128 and results were compared directly with the EDTA plasma sample from the Elecsys Anti-SARS-  
129 CoV-2 Assay (see Figure 1 for workflow).

130 All investigations were performed according in a single determination and according to the  
131 manufacturer's instructions for use.

132 ***Statistical analyses***

133 For sensitivity and specificity, point estimates and 95% CI values were calculated. To determine  
134 positive and negative percent agreement (PPA and NPA), the Elecsys Anti-SARS-CoV-2 result  
135 was used as comparator: »Non-reactive« (cut off index [COI] < 1.0) was a negative result and  
136 »Reactive« (COI ≥ 1.0) a positive result. The rapid test was considered positive in case either IgG  
137 or IgM showed a colored line, even if the line was faint. The Clopper–Pearson exact method  
138 was used for the calculation of the two-sided 95% confidence intervals (CIs).

139 ***Ethics and conformity declaration***

140 The study was conducted in accordance with applicable regulations, including relevant  
141 European Union directives and regulations, and the principles of the Declaration of Helsinki. All  
142 samples were anonymized leftover specimens. For the samples tested at Roche Diagnostics, a  
143 statement was obtained from the Ethics Committee of the Landesärztekammer Bayern  
144 confirming that there are no objections against the transfer and the coherent use of the  
145 anonymized leftover samples. For the samples tested in MVZLM Ruhr GmbH (Essen) and at  
146 MVZ Labor Dr. Limbach & Kollegen GbR (Heidelberg) no ethics committee vote is required in  
147 accordance with MPG (Medizinproduktegesetz Deutschland).

148

149 ***Data availability***

150 Qualified researchers may request access to individual patient level data through the clinical  
151 study data request platform (<https://vivli.org/>). Further details on Roche's criteria for eligible  
152 studies are available here: <https://vivli.org/members/ourmembers/>. For further details on  
153 Roche's Global Policy on the Sharing of Clinical Information and how to request access to

154 related clinical study documents, see here:

155 [https://www.roche.com/research\\_and\\_development/who\\_we\\_are/how\\_we\\_work/clinical\\_trials/our\\_commitment\\_to\\_data\\_sharing.htm](https://www.roche.com/research_and_development/who_we_are/how_we_work/clinical_trials/our_commitment_to_data_sharing.htm).

## 157 **Results**

### 158 ***Clinical performance evaluation***

159 The assay presented a qualitative visual test result without the need for a read-out instrument  
160 like other rapid antibody devices on the market. Some lines were quite faint, and according to  
161 manufacturer's instruction they have been interpreted as a positive result. Handling was easy  
162 with one sample-transfer step and three drops of buffer dropped into the well after the blood  
163 sample; the results read at 10–15 minutes. Except quality control material, lancets and a  
164 transferring pipette for 10 µl, everything needed to conduct the test was included into the test  
165 package. All test cassettes were correctly assembled, opening the foil pouch was easy without  
166 danger of destroying the desiccant and no membranes were scratched.

167 A total of 42 left-over samples with prior Elecsys-confirmed positive SARS-CoV-2 antibody  
168 detection were included in the sensitivity analysis. The overall sensitivity was 100.0% (95 % CI  
169 91.59–100.0) (Table 1). A total of 92 samples from healthy donors before December 2019  
170 presented an overall specificity of 96.74% (95% CI 90.77–99.32) with no difference between  
171 EDTA and lithium-heparin plasma: 97.22% (95% CI: 85.47–99.93)/96.43% (95% CI 87.69–99.56).

172 An additional matrix evaluation and read-out time analysis was performed with 159 SARS-CoV-2  
173 negative samples to confirm equal results throughout the pre-defined read-out time window.

174 At read out times  $\leq 10$  minutes specificity was slightly higher versus at 15 minutes (Table 2),  
175 however detectable signals were 'weaker' or less well defined at  $\leq 10$  minutes compared with



176 15 minutes read out time. No relevant performance differences were noticed between serum,  
177 heparin and EDTA plasma (Table 2).

178 Cross-reactivity was tested at 18 samples from a common cold panel, collected before  
179 December 2019 without further information on the exact pathogens of the specimens. For all  
180 18 measurements, a colored control line was obtained, indicating that the test worked  
181 properly. On the test lines for IgG and IgM no color appeared, thus leading to a negative result  
182 and resulting in a specificity of 100.0% (95 % CI 81.47–100.0%). The results demonstrated that  
183 the test is not reacting with antibodies directed against related pathogens from common cold  
184 infections.

#### 185 ***External method and matrix comparison***

186 Total results for both testing methods (plasma/whole blood samples) were 96.00% (95 % CI  
187 90.07–98.90) / 94.00% (95% CI 87.40–97.77) for positive percent agreement rate and 96.36%  
188 (95% CI 93.41–98.24) / 96.00 % (95% CI 92.96–97.99) for negative percent agreement rate. The  
189 sample numbers per matrix and per immunoglobulin class for the samples confirmed by the  
190 Elecsys test and the numbers differing from the Elecsys result are summarized in Table 3. The  
191 overall percent agreement rate between whole blood and EDTA plasma was 99.20% (95% CI  
192 97.68–99.83), the positive/negative percent agreement rates for whole blood versus EDTA  
193 plasma were 98.11 % (95% CI 93.35–99.77) / 99.63 (95% CI 97.95–99.99).

194 A total of 10 EDTA samples and 11 whole blood samples were detected antibody positive by the  
195 Anti-SARS-CoV-2 Rapid Antibody Assay but antibody negative by the Elecsys assay, see Table 4a  
196 for the respectively detected immunoglobulin classes and the respective signal intensity on the  
197 11 rapid tests. 96 plasma and 94 whole blood samples out of 100 Elecsys-positive samples were  
198 detected positive by the rapid test, see Table 4b for the respective immunoglobulin classes and

199 signal intensity of the six rapid test results. The matrix comparison for the Anti-SARS-CoV-2  
200 Rapid Antibody Assay found of 106 plasma samples with an antibody positive test result,  
201 included two samples which had negative tests results with whole blood. One out of 269  
202 negative test results on the rapid test with plasma displayed a positive result with whole blood.

## 203 **Discussion**

204 The COVID-19 pandemic has created an urgent need for antibody testing of large populations to  
205 determine seroprevalence and potential immunity, which will be of more importance if more  
206 conclusive scientific data on correlation between these factors become available (2, 3, 26, 30,  
207 31). The anticipated need for high testing capacities in PoC settings outside of large hospitals,  
208 calls for the development and validation of high-performance rapid antibody tests as reliable  
209 diagnostic instruments, in addition to the centralized antibody tests available. The evaluated  
210 Anti-SARS-CoV-2 Rapid Antibody Test complies with the acceptance criteria, defined by the FDA  
211 EUA on April 4, 2020, for SARS-CoV-2 antibody test developments (27). Our internal clinical  
212 performance evaluation confirmed the manufacturers' reported clinical sensitivity of the test  
213 with an uncharacterized cohort of antibody positive samples from a population with unknown  
214 time from symptom onset, which may reflect the typical clinical scenario for the test indication.  
215 The external comparison confirmed high agreement of both the Elecsys assay and the Anti-  
216 SARS-CoV-2 Rapid Antibody Test, also with no confirmed PCR result and time of sampling from  
217 symptom onset unknown. For both the internal and external evaluation, samples could be  
218 mixed, with some collected early after symptom onset. Both tests claim less than 100 %  
219 sensitivity <14 days after symptom onset (28, 29). The Elecsys Anti-SARS-CoV-2 Antibody Test  
220 measures high-affinity IgG/IgM antibodies directed at the nucleocapsid antigen, with an

221 excellent sensitivity of 100.0% (95% CI 88.1–100.0) at  $\geq 14$  days after PCR confirmation (28). The  
222 rapid test has been developed detecting both nucleocapsid- and spike protein-associated  
223 antibodies to increase test accuracy compared with centralized serological assays, which  
224 typically perform better than rapid tests. (29). A limitation of this study is that samples were  
225 not differentiated according to time of collection after symptom onset, as such some of the  
226 false positive samples might actually be true positives, but were not detected by the Elecsys  
227 assay and most likely indicate an early antibody response with low affinity antibodies. For SARS-  
228 CoV-2 tests high specificity is a priority, particularly in low prevalence settings (30), as such it  
229 would be interesting to further evaluate the interpretation of the low positive samples at the  
230 rapid test, particularly for samples that were IgM positive only, to determine if these reflect  
231 non-specific binding, or true early detection. Further assessment with serial samples taken from  
232 COVID-19 patients from early infection phase onwards will help to better understand this.

233 The investigated Anti-SARS-CoV-2 Rapid Antibody Test provided readily evaluable results,  
234 regardless of sample type (whole blood or EDTA plasma) and independent of any read-out time  
235 between 10 and 15 minutes, as stated in the instructions for use. Those positive practical  
236 aspects could enable potential use outside medical environments. The assay is currently  
237 intended for professional use in laboratory and PoC environments as an aid in identifying  
238 individuals with an adaptive immune response to SARS-CoV-2, indicating prior infection.

239 In these studies, the SARS-CoV-2 Rapid Antibody Test demonstrates excellent clinical  
240 performance without cross-reactivity to common cold samples and results comparable to data  
241 of an automated high-performance immunoassay (Elecsys). Our data confirm and extend the  
242 manufacturers' performance data and add further details on matrix and method comparisons.  
243 Available data support its use as a reliable diagnostic instrument for SARS-CoV-2 IgM and IgG

244 antibody detection in near-patient settings with potential extended usability outside medical  
245 environments.

## 246 **Acknowledgements**

247 The authors would like to acknowledge the contributions of Rabea Held, Regina Draude,  
248 Marcus Pollok (Roche Diagnostics GmbH, Mannheim, Germany) for testing, data acquisition in  
249 the laboratory and preliminary data analysis. In addition, thanks to Imola Szebenyi, Oscar  
250 Gutierrez-Sanz, Miriam Hübner, Ludwig Pollich, Nicolai Bluthardt, Andreas Aristow (Roche  
251 Diagnostics GmbH, Penzberg, Germany) for the measurements of the clinical and cross-  
252 reactivity samples as part of the study conducted at Roche Diagnostics. Thanks to John Burden  
253 (Roche Diagnostics International Ltd. Rotkreuz, Switzerland), Sven Groesgen (Roche Diagnostics  
254 GmbH, Mannheim, Germany) and Christine Jung (Roche Diagnostics GmbH, Penzberg,  
255 Germany) for planning, set-up and analysis of the external evaluation. The authors would also  
256 like to acknowledge Matthias Metz and Daria Glukhova for conducting the measurements with  
257 the Elecsys SARS-CoV-2 method as part of the study at Roche Diagnostics.

## 258 **Conflicts of interest/financial disclosures**

259 Eloisa Lopez-Calle, Tanja Schneider, Eva Urlaub, Johannes Hayer, are all employees of Roche  
260 Diagnostics. Claudia Zemmrich works as a freelance contractor for Roche Diagnostics.

## 261 **References**

- 262 1. The World Health Organization. 2020. Immunity passports in the context of COVID-19.  
263 [https://www.who.int/news-room/commentaries/detail/immunity-passports-in-the-context-of-](https://www.who.int/news-room/commentaries/detail/immunity-passports-in-the-context-of-covid-19)  
264 [covid-19](https://www.who.int/news-room/commentaries/detail/immunity-passports-in-the-context-of-covid-19). Accessed July 2020.

- 265 2. The European Centre for Disease Prevention and Control. 2020. Diagnostic testing and  
266 screening for SARS-CoV-2. [https://www.ecdc.europa.eu/en/covid-19/latest-](https://www.ecdc.europa.eu/en/covid-19/latest-evidence/diagnostic-testing)  
267 [evidence/diagnostic-testing](https://www.ecdc.europa.eu/en/covid-19/latest-evidence/diagnostic-testing). Accessed July 2020.
- 268 3. The US Centers for Disease Prevention and Control. 2020. Interim guidelines for COVID-19  
269 antibody testing. [https://www.cdc.gov/coronavirus/2019-ncov/lab/resources/antibody-tests-](https://www.cdc.gov/coronavirus/2019-ncov/lab/resources/antibody-tests-guidelines.html)  
270 [guidelines.html](https://www.cdc.gov/coronavirus/2019-ncov/lab/resources/antibody-tests-guidelines.html). Accessed June 2020.
- 271 4. Sethuraman N, Jeremiah SS, Ryo A. 2020. Interpreting diagnostic tests for SARS-CoV-2. JAMA  
272 doi:10.1001/jama.2020.8259.
- 273 5. Pollan M, Perez-Gomez B, Pastor-Barriuso R, Oteo J, Hernan MA, Perez-Olmeda M, Sanmartin JL,  
274 Fernandez-Garcia A, Cruz I, Fernandez de Larrea N, Molina M, Rodriguez-Cabrera F, Martin M,  
275 Merino-Amador P, Leon Paniagua J, Munoz-Montalvo JF, Blanco F, Yotti R, Group E-CS. 2020.  
276 Prevalence of SARS-CoV-2 in Spain (ENE-COVID): a nationwide, population-based  
277 seroepidemiological study. Lancet doi:10.1016/S0140-6736(20)31483-5.
- 278 6. Sandri MT, Azzolini E, Torri V, Carloni S, Tedeschi M, Castoldi M, Mantovani A, Rescigno M. 2020.  
279 IgG serology in health care and administrative staff populations from 7 hospital representative  
280 of different exposures to SARS-CoV-2 in Lombardy, Italy. medRxiv  
281 doi:10.1101/2020.05.24.20111245:2020.05.24.20111245.
- 282 7. Mizumoto K, Kagaya K, Zarebski A, Chowell G. 2020. Estimating the asymptomatic proportion of  
283 coronavirus disease 2019 (COVID-19) cases on board the Diamond Princess cruise ship,  
284 Yokohama, Japan, 2020. Euro Surveill 25;(10):2000180
- 285 8. European Centre for Disease Prevention and Control. 2020. Transmission of COVID-19.  
286 <https://www.ecdc.europa.eu/en/covid-19/latest-evidence/transmission>. Accessed July 2020.
- 287 9. The World Health Organization. 2020. Surveillance strategies for COVID-19 human infection:  
288 interim guidance. [https://www.who.int/publications/i/item/surveillance-strategies-for-covid-19-](https://www.who.int/publications/i/item/surveillance-strategies-for-covid-19-human-infection)  
289 [human-infection](https://www.who.int/publications/i/item/surveillance-strategies-for-covid-19-human-infection). Accessed July 2020.

- 290 10. Althoff KN, Coburn SB, Nash D. 2020. Contact tracing: Essential to the public health response  
291 and our understanding of the epidemiology of COVID-19. Clin Infect Dis  
292 doi:10.1093/cid/ciaa757.
- 293 11. Fiore VG, DeFelice N, Glicksberg BS, Perl O, Shuster A, Kulkarni K, O'Brien M, Pisauro MA, Chung  
294 D, Gu X. 2020. Containment of future waves of COVID-19: simulating the impact of different  
295 policies and testing capacities for contact tracing, testing, and isolation. medRxiv  
296 doi:10.1101/2020.06.05.20123372.
- 297 12. MacIntyre CR. 2020. Case isolation, contact tracing, and physical distancing are pillars of COVID-  
298 19 pandemic control, not optional choices. Lancet Infect Dis doi:10.1016/S1473-3099(20)30512-  
299 0.
- 300 13. Sen-Crowe B, McKenney M, Elkbuli A. 2020. COVID-19 laboratory testing issues and capacities as  
301 we transition to surveillance testing and contact tracing. Am J Emerg Med  
302 doi:10.1016/j.ajem.2020.05.071.
- 303 14. Steinbrook R. 2020. Contact Tracing, Testing, and Control of COVID-19-Learning From Taiwan.  
304 JAMA Intern Med doi:10.1001/jamainternmed.2020.2072.
- 305 15. Wu F, Wang A, Liu M, Wang Q, Chen J, Xia S, Ling Y, Zhang Y, Xun J, Lu L, Jiang S, Lu H, Wen Y,  
306 Huang J. 2020. Neutralizing antibody responses to SARS-CoV-2 in a COVID-19 recovered patient  
307 cohort and their implications. medRxiv  
308 doi:10.1101/2020.03.30.20047365:2020.03.30.20047365.
- 309 16. Guo L, Ren L, Yang S, Xiao M, Chang, Yang F, Dela Cruz CS, Wang Y, Wu C, Xiao Y, Zhang L, Han L,  
310 Dang S, Xu Y, Yang Q, Xu S, Zhu H, Xu Y, Jin Q, Sharma L, Wang L, Wang J. 2020. Profiling early  
311 humoral response to diagnose novel coronavirus disease (COVID-19). Clin Infect Dis  
312 doi:10.1093/cid/ciaa310.
- 313 17. Liu L, Liu W, Wang S, Zheng S. 2020. A preliminary study on serological assay for severe acute  
314 respiratory syndrome coronavirus 2 (SARS-CoV-2) in 238 admitted hospital patients. medRxiv  
315 doi:10.1101/2020.03.06.20031856:2020.03.06.20031856.

- 316 18. Long Q-X, Deng H-J, Chen J, Hu J, Liu B-Z, Liao P, Lin Y, Yu L-H, Mo Z, Xu Y-Y, Gong F, Wu G-C,  
317 Zhang X-C, Chen Y-K, Li Z-J, Wang K, Zhang X-L, Tian W-G, Niu C-C, Yang Q-J, Xiang J-L, Du H-X, Liu  
318 H-W, Lang C, Luo X-H, Wu S-B, Cui X-P, Zhou Z, Wang J, Xue C-J, Li X-F, Wang L, Tang X-J, Zhang Y,  
319 Qiu J-F, Liu X-M, Li JJ, Zhang D-C, Zhang F, Cai X-F, Wang D, Hu Y, Ren J-H, Tang N, Liu P, Li Q,  
320 Huang A-L. 2020. Antibody responses to SARS-CoV-2 in COVID-19 patients: the perspective  
321 application of serological tests in clinical practice. medRxiv  
322 doi:10.1101/2020.03.18.20038018:2020.03.18.20038018.
- 323 19. Lou B, Li T, Zheng S, Su Y, Li Z, Liu W, Yu F, Ge S, Zou Q, Yuan Q, Lin S, Hong C, Yao X, Zhang X, Wu  
324 D, Zhou G, Hou W, Li T, Zhang Y, Zhang S, Fan J, Zhang J, Xia N, Chen Y. 2020. Serology  
325 characteristics of SARS-CoV-2 infection since the exposure and post symptoms onset. medRxiv  
326 doi:10.1101/2020.03.23.20041707:2020.03.23.20041707.
- 327 20. Okba NMA, Marcel AM, Wentao L, Chunyan W, Corine HG, Victor MC, Mart ML, Reina SS, Erwin  
328 de B, Felicity DC, Yazdan Y, Quentin Le H, Diane D, Nadhira H-F, Chantal BEMR, Berend-Jan B,  
329 Christian D, Marion PGK, Bart LH. 2020. Severe acute respiratory syndrome coronavirus  
330 2–Specific antibody responses in coronavirus disease 2019 patients. *Emerging Infectious Disease*  
331 *journal* 26(7):1478–88..
- 332 21. Tan W, Lu Y, Zhang J, Wang J, Dan Y, Tan Z, He X, Qian C, Sun Q, Hu Q, Liu H, Ye S, Xiang X, Zhou  
333 Y, Zhang W, Guo Y, Wang X-H, He W, Wan X, Sun F, Wei Q, Chen C, Pan G, Xia J, Mao Q, Chen Y,  
334 Deng G. 2020. Viral Kinetics and Antibody Responses in Patients with COVID-19. medRxiv  
335 doi:10.1101/2020.03.24.20042382:2020.03.24.20042382.
- 336 22. To KK-W, Tsang OT-Y, Leung W-S, Tam AR, Wu T-C, Lung DC, Yip CC-Y, Cai J-P, Chan JM-C, Chik  
337 TS-H, Lau DP-L, Choi CY-C, Chen L-L, Chan W-M, Chan K-H, Ip JD, Ng AC-K, Poon RW-S, Luo C-T,  
338 Cheng VC-C, Chan JF-W, Hung IF-N, Chen Z, Chen H, Yuen K-Y. 2020. Temporal profiles of viral  
339 load in posterior oropharyngeal saliva samples and serum antibody responses during infection  
340 by SARS-CoV-2: an observational cohort study. *The Lancet Infectious Diseases* 20:565-574.

- 341 23. Zhao J, Yuan Q, Wang H, Liu W, Liao X, Su Y, Wang X, Yuan J, Li T, Li J, Qian S, Hong C, Wang F, Liu  
342 Y, Wang Z, He Q, Li Z, He B, Zhang T, Fu Y, Ge S, Liu L, Zhang J, Xia N, Zhang Z. 2020. Antibody  
343 responses to SARS-CoV-2 in patients of novel coronavirus disease 2019. Clin Infect Dis  
344 doi:10.1093/cid/ciaa344.
- 345 24. Amanat F, Stadlbauer D, Strohmeier S, Nguyen T, Chromikova V, McMahon M, Jiang K, Asthagiri-  
346 Arunkumar G, Jurczynszak D, Polanco J, Bermudez-Gonzalez M, Kleiner G, Aydillo T, Miorin L,  
347 Fierer D, Lugo LA, Milunka Kojic E, Stoeber J, Liu STH, Cunningham-Rundles C, Felgner PL,  
348 Caplivski D, Garcia-Sastre A, Cheng A, Kedzierska K, Vapalahti O, Hepojoki J, Simon V, Krammer  
349 F, Moran T. 2020. A serological assay to detect SARS-CoV-2 seroconversion in humans. medRxiv  
350 doi:10.1101/2020.03.17.20037713:2020.03.17.20037713.
- 351 25. Xiang F, Wang X, He X, Peng Z, Yang B, Zhang J, Zhou Q, Ye H, Ma Y, Li H, Wei X, Cai P, Ma WL.  
352 2020. Antibody detection and dynamic characteristics in patients with COVID-19. Clin Infect Dis  
353 doi:10.1093/cid/ciaa461.
- 354 26. Zhang J, Liu J, Li N, Liu Y, Ye R, Qin X, Zheng R. 2020. Serological detection of 2019-nCoV respond  
355 to the epidemic: A useful complement to nucleic acid testing. medRxiv  
356 doi:10.1101/2020.03.04.20030916:2020.03.04.20030916.
- 357 27. Administration UFaD. 2020. Policy for coronavirus disease-2019 tests during the public health  
358 emergency (Revised). [https://www.fda.gov/regulatory-information/search-fda-guidance-](https://www.fda.gov/regulatory-information/search-fda-guidance-documents/policy-coronavirus-disease-2019-tests-during-public-health-emergency-revised)  
359 [documents/policy-coronavirus-disease-2019-tests-during-public-health-emergency-revised](https://www.fda.gov/regulatory-information/search-fda-guidance-documents/policy-coronavirus-disease-2019-tests-during-public-health-emergency-revised).
- 360 28. Roche Diagnostics GmbH. 2020. Elecsys Anti-SARS-CoV-2 Method Sheet.
- 361 29. SD Biosensor. 2020. SARS-CoV-2 Rapid Antibody Test Method Sheet.
- 362 30. Ozcurumez MK, Ambrosch A, Frey O, Haselmann V, Holdenrieder S, Kiehntopf M, Neumaier M,  
363 Walter M, Wenzel F, Wolfel R, Renz H, Chemistry C-TFotGSfC, Laboratory M. 2020. SARS-CoV-2  
364 antibody testing-questions to be asked. J Allergy Clin Immunol 146:35-43.
- 365 31. Theel ES, Slev P, Wheeler S, Couturier MR, Wong SJ, Kadkhoda K. 2020. The Role of Antibody  
366 Testing for SARS-CoV-2: Is There One? J Clin Microbiol doi:10.1128/JCM.00797-20.



368 **Table 1. Performance data of the manufacturer, internal clinical performance test, matrix equivalence test and external method comparison**

|                                                                      | <b>SD Biosensor data**,<br/>% (95% CI)</b> | <b>Internal test,<br/>% (95% CI)</b>       | <b>Matrix evaluation,<br/>% (95% CI)</b>   | <b>External comparison<br/>(95% CI)</b> |
|----------------------------------------------------------------------|--------------------------------------------|--------------------------------------------|--------------------------------------------|-----------------------------------------|
| <b>Samples tested, n</b>                                             | 195+ / 222-                                | 42+ / 92-                                  | 159-                                       | 100+ / 275-                             |
| <b>Reference method</b>                                              | PCR                                        | Elecsys® Anti-SARS-CoV-2<br>Antibody Assay | Elecsys® Anti-SARS-CoV-2<br>Antibody Assay | <i>n.a.</i>                             |
| <b>Specificity versus<br/>Reference method</b>                       | 98.65<br>(96.10–99.72)                     | 96.74<br>(90.77–99.32)                     | 96.23<br>(91.97–98.60)                     | 96.00***<br>(90.07–98.90)               |
| <b>Sensitivity versus<br/>Reference method</b>                       | 92.59<br>(82.11–97.94)                     |                                            |                                            |                                         |
| <ul style="list-style-type: none"> <li>• 7–14 days*</li> </ul>       | 99.03<br>(94.71–99.98)                     |                                            |                                            |                                         |
| <ul style="list-style-type: none"> <li>• &gt; 14 days*</li> </ul>    |                                            | 100<br>(91.59–100.00)                      | n.a.                                       | 96.36***<br>(93.41–98.24)               |
| <ul style="list-style-type: none"> <li>• All time periods</li> </ul> |                                            |                                            |                                            |                                         |

369

370 n.a. not applicable; +/-, positive/negative for SARS-CoV-2 determined by respective reference method

371 \*Post symptom onset; \*\*according to Anti-SARS-CoV-2 Rapid Antibody Assay Method sheet; \*\*\*positive/negative percent agreement with

372 Elecsys Anti-SARS-CoV-2 in EDTA plasma, data in italics as generated by comparative analysis, not clinical performance analysis

373

374 **Table 2. Matrix evaluation and read-out time analysis**

|                           |                                          | Read out time       |                     |                     |                     |
|---------------------------|------------------------------------------|---------------------|---------------------|---------------------|---------------------|
|                           |                                          | 8 mins              | 10 mins             | 12 mins             | 15 mins             |
| <b>Total</b>              | <b>Number of samples test (negative)</b> | 159                 | 159                 | 159                 | 159                 |
|                           | <b>False positive</b>                    | 4                   | 5                   | 6                   | 6                   |
|                           | <b>Specificity % (95% CI)</b>            | 97.48 (93.68–99.31) | 96.86 (92.81–98.97) | 96.23 (91.97–98.60) | 96.23 (91.97–98.60) |
| <b>Serum</b>              | <b>Number of samples test (negative)</b> | 49                  | 49                  | 49                  | 49                  |
|                           | <b>False positive</b>                    | 1                   | 2                   | 2                   | 2                   |
|                           | <b>Specificity % (95% CI)</b>            | 97.96 (89.15–99.95) | 95.92 (86.02–99.50) | 95.92 (86.02–99.50) | 95.92 (86.02–99.50) |
| <b>Heparin<br/>plasma</b> | <b>Number of samples test (negative)</b> | 55                  | 55                  | 55                  | 55                  |
|                           | <b>False positive</b>                    | 1                   | 1                   | 2                   | 2                   |
|                           | <b>Specificity % (95% CI)</b>            | 98.18 (90.28–99.95) | 98.18 (90.28–99.95) | 96.36 (87.47–99.56) | 96.36 (87.47–99.56) |
| <b>EDTA<br/>plasma</b>    | <b>Number of samples test (negative)</b> | 55                  | 55                  | 55                  | 55                  |
|                           | <b>False positive</b>                    | 2                   | 2                   | 2                   | 2                   |
|                           | <b>Specificity % (95% CI)</b>            | 96.36 (87.47–99.56) | 96.36 (87.47–99.56) | 96.36 (87.47–99.56) | 96.36 (87.47–99.56) |

375

376 **Table 3. External comparison to Elecsys Anti-SARS-CoV-2 per matrix and immunoglobulin**

377 **class**

|                                                     | Number of results (Whole blood) |     |         |       | Number of results (EDTA Plasma) |     |         |       |
|-----------------------------------------------------|---------------------------------|-----|---------|-------|---------------------------------|-----|---------|-------|
|                                                     | IgM                             | IgG | IgM+IgG | Total | IgM                             | IgG | IgM+IgG | Total |
| <b>SARS-CoV-2 positive (confirmed by Elecsys)</b>   | 1                               | 57  | 36      | 94    | 0                               | 54  | 42      | 96    |
| <b>SARS-CoV-2 negative (confirmed by Elecsys)</b>   | 0                               | 0   | 0       | 264   | 0                               | 0   | 0       | 265   |
| <b>False positive results (compared to Elecsys)</b> | 4                               | 5   | 2       | 11    | 3                               | 5   | 2       | 10    |
| <b>False negative results (compared to Elecsys)</b> | 0                               | 0   | 0       | 6     | 0                               | 0   | 0       | 4     |
| <b>OPA (95%CI)</b>                                  | 95.47% (92.84–97.34)            |     |         |       | 96.27% (93.82–97.94)            |     |         |       |
| <b>PPA (95% CI)</b>                                 | 94.00% (87.40–97.77)            |     |         |       | 96.00% (90.07–98.90)            |     |         |       |
| <b>NPA (95% CI)</b>                                 | 96.00% (92.96–97.99)            |     |         |       | 96.36% (93.41–98.24)            |     |         |       |

378 OPA, overall percentage agreement; PPA, positive percentage agreement; NPA, negative

379 percentage agreement

380 **Table 4a: Method comparison: Discrepant positive samples - detected signal intensity and immunoglobulin class**

| Sample number | Rapid AB results – whole blood |          | Rapid AB results – EDTA plasma |          | Elecsys results (EDTA plasma) |       |
|---------------|--------------------------------|----------|--------------------------------|----------|-------------------------------|-------|
|               | IgG                            | IgM      | IgG                            | IgM      | Result                        | COI   |
| 1             | -                              | X (weak) | -                              | X (weak) | Non-reactive                  | 0.089 |
| 2             | -                              | X (weak) | -                              | X (weak) | Non-reactive                  | 0.119 |
| 3             | -                              | X (weak) | -                              | X (weak) | Non-reactive                  | 0.089 |
| 4             | X (weak)                       | -        | X (weak)                       | -        | Non-reactive                  | 0.079 |
| 5             | -                              | X (weak) | -                              | -        | Non-reactive                  | 0.069 |
| 6             | X (weak)                       | X (weak) | X (weak)                       | X (weak) | Non-reactive                  | 0.229 |
| 7             | X                              | -        | X                              | -        | Non-reactive                  | 0.146 |
| 8             | X (weak)                       | -        | X (weak)                       | -        | Non-reactive                  | 0.221 |
| 9             | X (weak)                       | -        | X (weak)                       | -        | Non-reactive                  | 0.269 |
| 10            | X                              | X        | X                              | X        | Non-reactive                  | 0.189 |
| 11            | X                              | -        | X                              | -        | Non-reactive                  | 0.378 |

381 AB, antibody

382 **Table 4b Method comparison: Discrepant negative samples - detected signal intensity and immunoglobulin class**

| Sample number | Rapid AB results – whole blood |     | Rapid AB results – EDTA plasma |     | Elecsys results (EDTA plasma) |       |
|---------------|--------------------------------|-----|--------------------------------|-----|-------------------------------|-------|
|               | IgG                            | IgM | IgG                            | IgM | Result                        | COI   |
| 1             | -                              | -   | -                              | -   | Reactive                      | 1.21  |
| 2             | -                              | -   | -                              | -   | Reactive                      | 1.99  |
| 3             | -                              | -   | X (weak)                       | -   | Reactive                      | 39.54 |
| 4             | -                              | -   | -                              | -   | Reactive                      | 2.32  |
| 5             | -                              | -   | -                              | -   | Reactive                      | 2.34  |
| 6             | -                              | -   | X (weak)                       | -   | Reactive                      | 16.7  |

383 AB, antibody

384

385 **Figure 1. External method and matrix comparison – workflow**

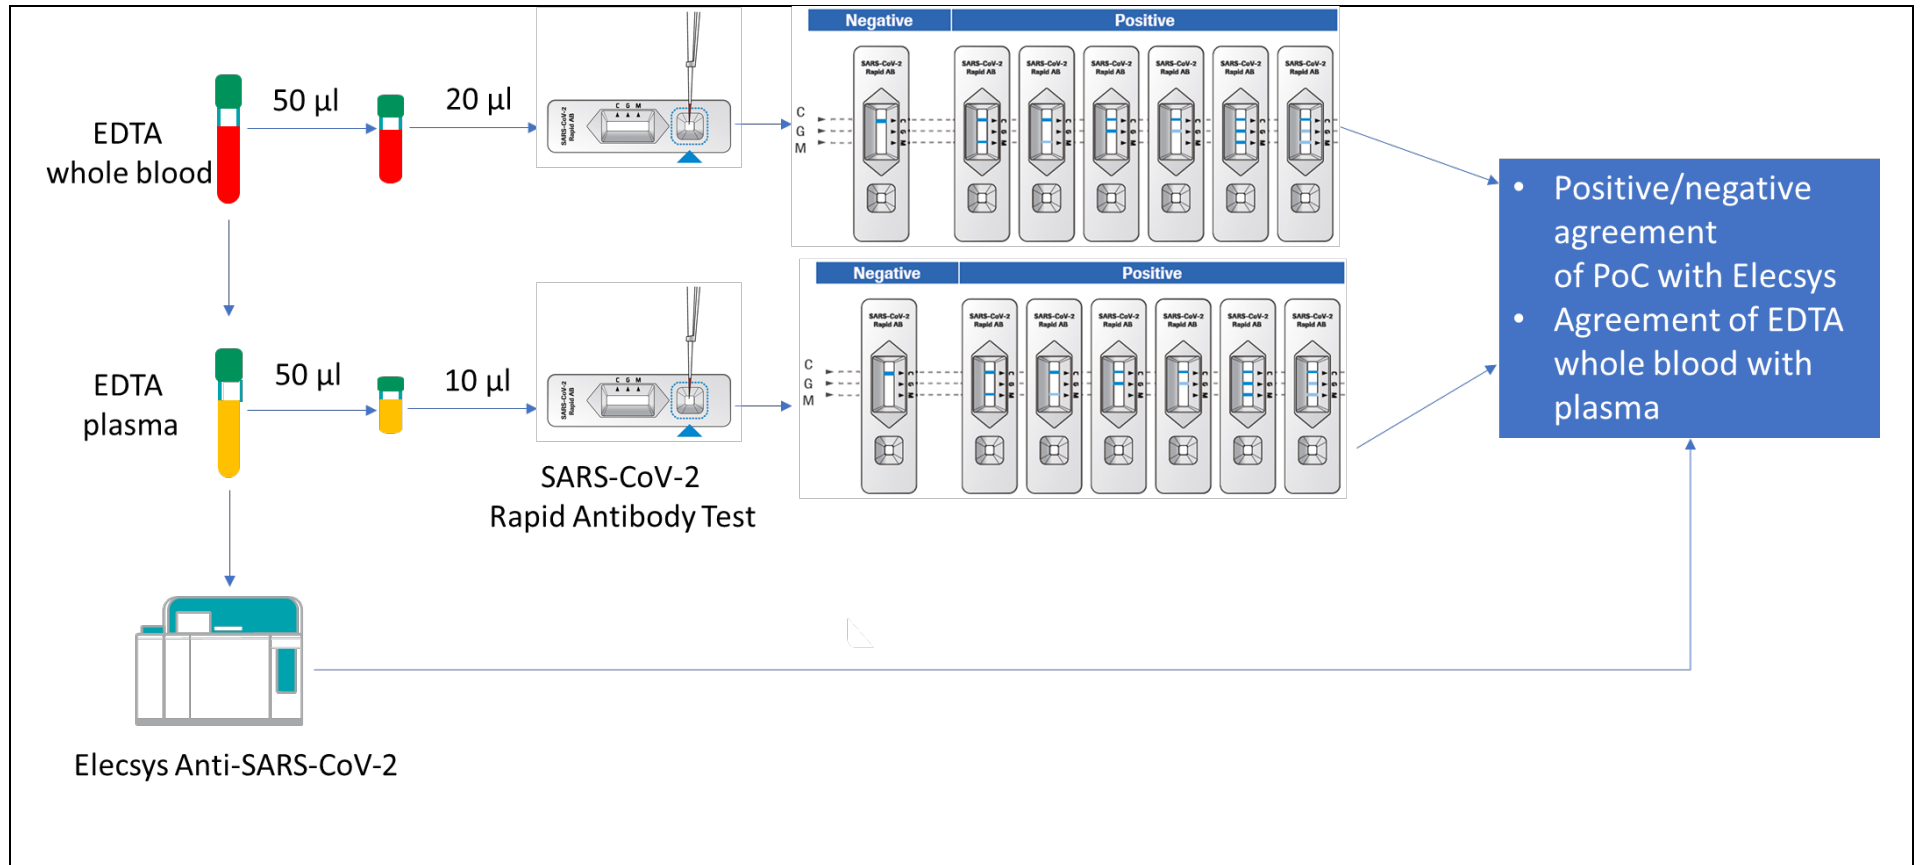

386
